# Supplementary material for: Genomic Characterization of Diverse Bat Coronavirus HKU10 in Hipposideros Bats
Source: Viruses. 2021 Sep 29;13(10):1962. doi: 10.3390/v13101962 (PMC8540636; doi:10.3390/v13101962)
Supplement: Supplementary file 1 [file viruses-13-01962-s001.zip]

Archive with 6 entries (6 files):
- viruses-1340913-supp-proof/Supplementary Table S1_Primers.xlsx
- viruses-1340913-supp-proof/Supplementary Table S2_Bats and HKU10.xlsx
- viruses-1340913-supp-proof/Supplementary Table S3_Genomes.xlsx
- viruses-1340913-supp-proof/Supplementary Table S4_comparation.xlsx
- viruses-1340913-supp-proof/Supplementary Table S5_Pseudovirus entry.xlsx
- viruses-1340913-supp-proof/viruses-1340913-supp-conv.pdf
