# Supplementary material for: Genomic Characterization of Diverse Bat Coronavirus HKU10 in Hipposideros Bats
Source: Viruses. 2021 Sep 29;13(10):1962. doi: 10.3390/v13101962 (PMC8540636; doi:10.3390/v13101962)
Supplement: Supplementary file 1 [file viruses-13-01962-s001.zip › viruses-1340913-supp-proof/Supplementary Table S1_Primers.xlsx]

## Sheet: Supplementary Table S1
Supplementary S1. Primer pairs for HKU10 detection and genome sequencing
Primers	Sequences	Target Genes
CoV-FWD3	GGTTGGGAYTAYCCHAARTGTGA	RdRp
CoV-RVS3	CCATCATCASWYRAATCATCATA	RdRp
CoV-FWD4	GAYTAYCCHAARTGTGAYAGAGC	RdRp
αCoV-5UTR	TCTTGTYTGAAACCWGTAACTGT	5' UTR
αCoV-1a	STCCAATCACCAACAGTCCA	nsp2
αCoV RdRp F1	ATCANGATANTTATGGTTGTGC	nsp10
αCoV RdRp R1	ATGGANTGCTCGTGTTCCAT	nsp12
αCoV RdRp F2	TCTAGTGCAGCTCGACTAGA	nsp12
αCoV RdRp R2	GTTCAGAACCCTCNTCAAAGA	nsp12
αCoV RdRp F3	GTNTTTATTGATGGTGTNCC	nsp12
αCoV RdRp R3	TCACCNGATGTNGTACCACC	nsp12
αCoV RdRp F4	GCCTAANATGATNCGTATGA	nsp12
αCoV RdRp R4	GCATANGANGACTTAACAC	nsp13
αCoV 1b F	ACACCWGCWTWTGAYAARCGTGC	nsp14
αCoV 1b R	GGCATRGWRTAVCCRCAYTTCC	nsp16
αCoV S F	GHATHATGGTDYTNCCNGGTGT	S
αCoV S R	GCMAGNACDARNGGCCANA	S
αCoV M F	TRGARGGCWWTAAGGTTGCTAC	M
αCoV N R	CNTYRCYACCAAACAGCA	N
HKU10 5U-RdRp F	GGTGCCAATGGTCTTCCTGCCTGTG	5’ UTR
HKU10 5U-RdRp R	GCAGGCTTTCGACAACGGTTATTT	RdRp
HKU10 RdRp-1b F	CGTTGTCGAAAGCCTGCATAGC	RdRp
HKU10 RdRp-1b R	CAGCATCAGAACCGTAATCAA	nps14
HKU10 1b-N F	TGGTTTGCACCTGCTTATTTCCCAAGTACG	nsp16
HKU10 1b-N R	GCCACTCCGGCCTCTAGGCTTGTTA	N
HKU10 3' Race	AGCAATTCTGGTAGCAACACTC	N
