# Supplementary material for: Genomic Characterization of Diverse Bat Coronavirus HKU10 in Hipposideros Bats
Source: Viruses. 2021 Sep 29;13(10):1962. doi: 10.3390/v13101962 (PMC8540636; doi:10.3390/v13101962)
Supplement: Supplementary file 1 [file viruses-13-01962-s001.zip › viruses-1340913-supp-proof/Supplementary Table S2_Bats and HKU10.xlsx]

## Sheet: Supplementary Table S2
	Supplementary Table S2. Detection of HKU10 in bats by RT-PCR
	Bats	No. of bats positive for HKU10 / No. of bats tested
	Family, genus, and specific name	Gansu	Xizang	Ningxia	Beijing	Tianjin	Hebei	Henan	Shandong	Shanxi	Shaanxi	Hubei	Hunan	Sichuan	Chongqing	Anhui	Fujian	Jiangsu	Jiangxi	Zhejiang	Guizhou	Yunnan	Guangxi	Hainan	Guangdong	Macao	Laos	Total (%)
	Pteropodidae																					0/181	0/43	0/90	0/78		0/65	0/457
	Cynopterus																					0/26		0/8	0/76			0/110
	Cynopterus sphinx																					0/26		0/8	0/76			0/110
	Eonycteris																					0/57					0/18	0/75
	Eonycteris spelaea																					0/57					0/18	0/75
	Rousettus																					0/98	0/43	0/82	0/2		0/47	0/272
	Rousettus aegyptiacus																										0/3	0/3
	Rousettus leschenaulti																					0/17	0/43	0/82	0/2			0/144
	Rousettus spp.																					81					0/44	0/125
	Emballonuridae																				0/4	0/29	0/180					0/213
	Taphozous																				0/4	0/29	0/180					0/213
	Taphozous australis																						0/52					0/52
	Taphozous melanopogon																				0/4	0/29	0/128					0/161
	Megadermatidae																								0/1			0/1
	Megaderma																								0/1			0/1
	Megaderma lyra																								0/1			0/1
	Molossidae																					0/56			0/5			0/61
	Chaerephon																					0/56			0/5			0/61
	Chaerephon plicata																					0/56			0/5			0/61
	Rhinolophidae	0/1	0/3		0/5		0/47	0/148	0/49	0/86		0/519	0/165	0/52	0/148	0/40	0/69	0/74	0/14	0/45	0/356	0/1226	0/147	0/337	0/947	0/537	0/27	0/5042
	Aselliscus																					0/155					1/10 (10%)	1/165 (0.6%)
	Aselliscus stoliczkanus																					0/155					1/10 (10%)	1/165 (0.6%)
	Hipposideros							0/144				0/408	0/92	0/12	0/127	0/40	0/14		0/14	0/28	0/131	0/123	0/55	0/140	0/401	0/317	0/17	25/2063 (1.3%)
	Hipposideros armiger							0/44				0/282	0/87	0/2		0/40	0/14		0/5	0/6	0/68	0/72	0/18	0/14	0/219	0/317		0/1188
	Hipposideros larvatus														0/2							8/24 (33%)	0/28	0/92	0/50			8/196 (4.1%)
	Hipposideros pomona																					5/27 (19%)	3/9	2/25 (8%)	2/108 (1.9%)		5/17 (35%)	17/186 (9.7%)
	Hipposideros pratti											0/126	0/5						0/9	0/22	0/63				0/24			0/249
	Hipposideros spp.							0/100						0/10	0/125									0/9				0/244
	Rhinolophus	0/1	0/3	0/	0/5		0/47	0/4	0/49	0/86		0/111	0/73	0/40	0/21		0/55	0/74		0/17	0/225	0/948	0/92	0/197	0/546	0/220		0/2814
	Rhinolophus affinis							0/4				0/50	0/4					0/24		0/14	0/16	0/291		0/145	0/93			0/641
	Rhinolophus blythi											0/15										0/1			0/1			0/17
	Rhinolophus ferrumequinum	0/1			0/5		0/35		0/23	0/86							0/1					0/5						0/156
	Rhinolophus lepidus																0/21				0/1							0/22
	Rhinolophus luctus																			0/1				0/1	0/6			0/8
	Rhinolophus macrotis						0/8					0/1	0/3					0/2			0/3				0/14			0/31
	Rhinolophus marshalli																						0/1					0/1
	Rhinolophus monoceros																					0/7						0/7
	Rhinolophus pearsonii		0/3										0/7				0/2				0/34	0/13			0/25			0/84
	Rhinolophus pusillus						0/4		0/26				0/1				0/23	0/14			0/12	0/30	0/70	0/42	0/215	0/220		0/657
	Rhinolophus rex												0/1		0/2						0/9	0/2						0/14
	Rhinolophus rouxii														0/1													0/1
	Rhinolophus shameli																					0/3						0/3
	Rhinolophus sinicus											0/45	0/57	0/40			0/8	0/34		0/2	0/150	0/482	0/17	0/9	0/192			0/1036
	Rhinolophus spp.														0/18							0/78	0/4					0/100
	Rhinolophus subrufus																					0/35						0/35
	Rhinolophus thomasi																					0/1						0/1
	Vespertilionidae	0/11	0/3	0/17	0/25	0/37		0/29		0/34	0/26	0/136	0/51	0/186	0/5		0/29	0/14	0/52	0/4	0/78	0/472	0/7	0/283	0/578	0/124	0/29	0/2230
	Barbastella	0/3		0/1							0/21		0/1															0/26
	Barbastella beijingensis	0/3		0/1							0/21																	0/25
	Barbastella spp.												0/1															0/1
	Ia																					0/10			0/11			0/21
	Ia io																					0/10			0/11			0/21
	Miniopterus							0/29									0/13		0/9	0/4	0/6	0/220		0/73	0/147	0/27	0/29	0/557
	Miniopterus fuliginosus																					0/24						0/24
	Miniopterus fuscus																										0/29	0/29
	Miniopterus magnate																					0/64						0/64
	Miniopterus pusillus																							0/3	0/94			0/97
	Miniopterus schreibersii							0/29									0/13		0/9	0/4	0/6	0/59		0/70	0/53	0/27		0/270
	Miniopterus spp.																					0/73						0/73
	Myotis	0/8		0/3	0/25	0/37				0/34	0/1	10/36	0/36	0/44	0/5		0/16	0/14	0/42		0/70	0/211	0/3	0/34	0/224	0/17		0/960
	Myotis adversus																					0/79			0/4			0/83
	Myotis altarium												0/14				0/16	0/1			0/19				0/1			0/51
	Myotis blythii	0/6		0/1																								0/7
	Myotis brandti	0/2		0/2														0/6										0/10
	Myotis chinensis											0/48	0/11								0/24	0/21			0/31			0/135
	Myotis daubentonii												0/6								0/4	0/25		0/33	0/39			0/107
	Myotis davidii											0/10	0/1									0/7						0/18
	Myotis fimbriatus									0/6	0/1																	0/7
	Myotis frater												0/4								0/6				0/35			0/45
	Myotis myotis																		0/10									0/10
	Myotis pequinius									0/28																		0/28
	Myotis pilosus											0/49		0/44														0/93
	Myotis ricketti				0/25	0/37						0/16			0/1				0/32			0/57		0/1	0/106	0/17		0/292
	Myotis siligorensis																				0/1		0/3					0/4
	Myotis spp.											0/13			0/4			0/7			0/16	0/22			0/8			0/70
	Nyctalus												0/10	0/11											0/1			0/22
	Nyctalus noctula													0/11														0/11
	Nyctalus velutinus												0/10												0/1			0/11
	Pipistrellus										0/4		0/4	0/1							0/2	0/9	0/4	0/9	0/121	0/25		0/179
	Pipistrellus abramus												0/4								0/1			0/9	0/110	0/12		0/136
	Pipistrellus minus																								0/3	0/13		0/16
	Pipistrellus pipistrellus										0/4			0/1							0/1	0/9	0/4		0/4			0/23
	Pipistrellus pulveratus																								0/4			0/4
	Plecotus		0/3	0/13																								0/16
	Plecotus auritus		0/3	0/13																								0/16
	Scotomanes																								0/1			0/1
	Scotomanes ornatus																								0/1			0/1
	Scotophilus																		0/1			0/2		0/167	0/30			0/200
	Scotophilus heathi																		0/1			0/2						0/3
	Scotophilus kuhli																							0/167	0/30			0/197
	Tylonycteris																					0/20			0/43	0/55		0/118
	Tylonycteris pachypus																					0/2			0/43	0/55		0/100
	Tylonycteris robustula																					0/18						0/18
	Vespertilio													0/130														0/130
	Vespertilio sinensis													0/130														0/130
	Total	0/12	0/6	0/17	0/30	0/37	0/47	0/177	0/49	0/120	0/26	0/655	0/216	0/238	0/153	0/40	0/98	0/88	0/66	0/49	0/438	13/1964 (0.7%)	3/377 (0.8%)	2/710 (0.3%)	2/1609 (0.1%)	0/661	6/121 (5.8%)	26/8004(0.3%)
