# Supplementary material for: Genomic Characterization of Diverse Bat Coronavirus HKU10 in Hipposideros Bats
Source: Viruses. 2021 Sep 29;13(10):1962. doi: 10.3390/v13101962 (PMC8540636; doi:10.3390/v13101962)
Supplement: Supplementary file 1 [file viruses-13-01962-s001.zip › viruses-1340913-supp-proof/Supplementary Table S3_Genomes.xlsx]

## Sheet: Supplementary Table S3
	Supplementary Table S3. Genome size, coding potential, and putative transcription regulatory sequences of 11 BtCoV HKU10 strains.
	CoV	Genome size (nt)	G+C (%)	ORFs	Nucleotide positions	No. of nucleotides	Predicted size (aa) of protein	Frame	TRS suquence
	YN887	28534	38.35	1ab	303-20659	20358	6785	+3	CUAAAC(220)AUG
				1a	303-12626	12324	4108
				1b	12626-20659	8034	2677
				S	20656-24717	4062	1353	+1	CUAAAC(4)AUG
				NS3	24717-25373	657	218	3	CAACGT(29)AUG
				E	25402-25629	228	75	+1	CUAAAC(18)AUG
				M	25635-26321	687	228	3	CUAAAC(3)AUG
				N	26333-27559	1227	408	+2	CUAAAC(4)AUG
				7a	27575-27820	246	81	+2	CUAAAC(5)AUG
				7b	27826-28287	462	153	+1
	YN3723	28519	38.34	1ab	303-20641	20340	6779	+3	CUAAAC(220)AUG
				1a	303-12608	12306	4102
				1b	12608-20641	8007	2678
				S	20638-24702	4065	1354	+1	CUAAAC(4)AUG
				NS3	24702-25358	657	318	+3	CAACGT(29)AUG
				E	25387-25614	228	75	+1	CUAAAC(18)AUG
				M	25620-26309	690	229	+3	CUAAAC(3)AUG
				N	26321-27547	1227	408	+2	CUAAAC(4)AUG
				NS7a	27563-27805	243	80	+2	CUAAAC(5)AUG
				NS7b	27816-28274	459	152	+3
				NS7c	28012-28188	177	58	+1
	YN3740	28540	38.33	1ab	303-20662	20361	6786	+3	CUAAAC(220)AUG
				1a	303-12629	12327	4109
				1b	12629-20662	8034	2677
				S	20659-24723	4065	1354	+1	CUAAAC(4)AUG
				NS3	24723-25379	657	218	+3	CAACGT(38)AUG
				E	25408-25635	228	75	+1	CUAAAC(18)AUG
				M	25641-26330	690	229	+3	CUAAAC(3)AUG
				N	26342-27568	1227	408	+2	CUAAAC(4)AUG
				NS7a	27584-27826	243	80	+2	CUAAAC(5)AUG
				NS7b	27837-28295	459	152	+3
				NS7c	28033-28209	177	58	+1
	YN4996	28513	38.34	1ab	303-20650	20349	6782	+3	CUAAAC(220)AUG
				1a	303-12608	12306	4102
				1b	12608-20650	8043	2680
				S	20638-24699	4062	1353	+1	CUAAAC(4)AUG
				NS3	24699-25355	657	218	+3	CAACGT(38)AUG
				E	25384-25611	228	75	+1	CUAAAC(18)AUG
				M	25617-26303	687	228	+3	CUAAAC(3)AUG
				N	26315-27541	1227	408	+2	CUAAAC(4)AUG
				NS7a	27557-27799	243	80	+2	CUAAAC(5)AUG
				NS7b	27810-28268	459	152	+3
	YN7345	28512	38.19	1ab	303-20656	20355	6784	+1	CUAAAC(220)AUG
				1a	303-12614	12312	4104
				1b	12614-20656	8043	2680
				S	20644-24693	4050	1349	+1	CUAAAC(4)AUG
				NS3	24693-25349	657	218	+3	CAACGT(29)AUG
				E	25378-25605	228	75	+1	CUAAAC(18)AUG
				M	25611-26297	687	228	+3	CUAAAC(3)AUG
				N	26308-27534	1227	408	+1	CUAAAC(3)AUG
				NS7a	27550-27795	241	81	+1	CUAAAC(5)AUG
				NS7b	27805-28266	462	153	+1
	GX160935	28514	38.30	1ab	303-20656	20355	6784	+3	CUAAAC(220)AUG
				1a	303-12623	12321	4107
				1b	12623-20656	8034	2677
				S	20653-24714	4062	1353	+2	CUAAAC(4)AUG
				NS3	24714-25370	657	218	+3	CAACGT(32)AUG
				E	25399-25626	228	75	+1	CUAAAC(18)AUG
				M	25632-26318	687	228	+3	CUAAAC(3)AUG
				N	26330-27538	1209	402	+3	CUAAAC(4)AUG
				NS7a	27554-27796	243	80	+2	CUAAAC(5)AUG
				NS7b	27806-28267	462	153	+2
				NS7c	27954-28181	228	75	+3
	GD141391	28490	38.40	1ab	303-20653	20352	6783	+3	CUAAAC(220)AUG
				1a	303-12611	12309	4103
				1b	12611-20653	8043	2680
				S	20641-24690	4050	1349	+1	CUAAAC(4)AUG
				NS3	24690-25346	657	218	+3	CAACGT(29)AUG
				E	25375-25602	228	75	+1	CUAAAC(18)AUG
				M	25608-26294	687	228	+3	CUAAAC(3)AUG
				N	26306-27514	1209	402	+2	CUAAAC(4)AUG
				NS7a	27530-27772	243	80	+2	CUAAAC(5)AUG
				NS7b	27782-28243	462	153	+2
				NS7c	27981-28211	231	76	+3
	GD141402	28490	38.39	1ab	303-20653	20352	6783	+3	CUAAAC(220)AUG
				1a	303-12611	12309	4103
				1b	12611-20653	8043	2680
				S	20641-24690	4050	1349	+1	CUAAAC(4)AUG
				NS3	24690-25346	657	218	+3	CAACGT(29)AUG
				E	25375-25602	228	75	+1	CUAAAC(18)AUG
				M	25608-26294	687	228	+3	CUAAAC(3)AUG
				N	26306-27514	1209	402	+2	CUAAAC(4)AUG
				NS7a	27530-27772	243	80	+2	CUAAAC(5)AUG
				NS7b	27782-28243	462	153	+2
				NS7c	27981-28211	231	76	+3
	HN140937	28517	38.75	1ab	303-20713	20412	6803	+2	CUAAAC(220)AUG
				1a	303-12680	12378	4126
				1b	12680-20713	8034	2677
				S	20710-24780	4071	1356	+1	CUAAAC(4)AUG
				NS3	24780-25436	657	218	+3	CAACGT(29)AUG
				E	25465-25692	228	75	+1	CUAAAC(18)AUG
				M	25698-26387	690	229	+3	CUAAAC(3)AUG
				N	26399-27613	1215	404	+2	CUAAAC(4)AUG
				NS7a	27629-27868	240	79	+2	CUAAAC(5)AUG
				NS7b	27878-28342	465	154	+2
				NS7c	28077-28307	231	76	+3
	LA7546	28514	38.31	1ab	303-20662	20361	6786	+3	CUAAAC(220)AUG
				1a	303-12620	12318	4106
				1b	12620-20662	8043	2680
				S	20650-24699	4050	1349	+1	CUAAAC(4)AUG
				NS3	24699-25355	657	218	+3	CAACGT(29)AUG
				E	25384-25611	228	75	+1	CUAAAC(18)AUG
				M	25617-26303	687	228	+3	CUAAAC(3)AUG
				N	26315-27541	1227	408	+2	CUAAAC(4)AUG
				NS7a	27557-27799	243	80	+2	CUAAAC(5)AUG
				NS7b	27810-28268	459	152	+3
	LA7549	28523	38.30	1ab	303-20653	20352	6783	+3	CUAAAC(220)AUG
				1a	303-12620	12318	4106
				1b	12620-20653	8034	2677
				S	20650-24714	4065	1354	+2	CUAAAC(4)AUG
				NS3	24714-25370	657	218	+3	CAACGT(29)AUG
				E	25399-25626	228	75	+1	CUAAAC(18)AUG
				M	25632-26312	681	226	+3	CUAAAC(3)AUG
				N	26324-27550	1227	408	+2	CUAAAC(4)AUG
				NS7a	27566-27808	243	80	+2	CUAAAC(5)AUG
				NS7b	27819-28277	459	152	+3
	LA7557	28529	38.26	1ab	303-20653	20352	6783	+3	CUAAAC(220)AUG
				1a	303-12620	12318	4106
				1b	12620-20653	8034	2677
				S	20650-24714	4065	1354	+1	CUAAAC(4)AUG
				NS3	24714-25370	657	218	+3	CAACGT(29)AUG
				E	25399-25626	228	75	+1	CUAAAC(18)AUG
				M	25632-26318	687	228	+3	CUAAAC(3)AUG
				N	26330-27556	1227	408	+2	CUAAAC(4)AUG
				NS7a	27572-27814	243	80	+2	CUAAAC(5)AUG
				NS7b	27825-28283	459	152	+3
	LA7560	28523	38.30	1ab	303-20653		6783	+3	CUAAAC(220)AUG
				1a	303-12620	12318	4106
				1b	12620-20653	8034	2677
				S	20650-24714	4065	1354	+1	CUAAAC(4)AUG
				NS3	24714-25370	657	218	+3	CAACGT(29)AUG
				E	25399-25626	228	75	+1	CUAAAC(18)AUG
				M	25632-26312	681	226	+3	CUAAAC(3)AUG
				N	26324-27550	1227	408	+2	CUAAAC(4)AUG
				NS7a	27566-27808	243	80	+2	CUAAAC(5)AUG
				NS7b	27819-28277	459	152	+3
	LA7565	28529	38.25	1ab	303-20653	20352	6783	+3	CUAAAC(220)AUG
				1a	303-12620	12318	4106
				1b	12620-20653	8034	2677
				S	20650-24714	4065	1354	+1	CUAAAC(4)AUG
				NS3	24714-25370	657	218	+3	CAACGT(29)AUG
				E	25399-25626	228	75	+1	CUAAAC(18)AUG
				M	25632-26318	687	228	+3	CUAAAC(3)AUG
				N	26330-27556	1227	408	+2	CUAAAC(4)AUG
				NS7a	27572-27814	243	80	+2	CUAAAC(5)AUG
				NS7b	27825-28283	459	152	+3
	LA7496	28021	38.75	1ab	303-20701	20400	6799	+3	CUAAAC(220)AUG
				1a	303-12644	12342	4113
				1b	12644-20701	8058	2685
				S	20673-24731	4059	1352	+3	CUAAAC(3)AUG
				NS3	24731-25363	633	210	+2	CAACGT(29)AUG
				E	25390-25617	228	75	+1	CUAAAC(16)AUG
				M	25623-26306	684	227	+3	CUAAAC(3)AUG
				N	26317-27531	1215	404	+1	CUAAAC(3)AUG
				NS7a	27539-27772	234	77	+2	CUAAAC(5)AUG
	YN2714	28216	39.81	1ab	300-20473	20175	6724	+3	CUAAAC(216)AUG
				1a	300-12440	12141	4047
				1b	12440-20473	8034	2677
				S	20470-24528	4059	1352	+1	CUAAAC(4)AUG
				NS3	24528-25184	657	218	+3	CATTAC(26)AUG
				E	25209-25433	225	74	+3	CUAAAC(10)AUG
				M	25440-26120	681	226	+3	CUAAAC(4)AUG
				N	26131-27285	1155	384	+1	CUAAAC(3)AUG
				NS7a	27295-27546	252	83	+1	CUAAAC(7)AUG
				NS7b	27534-27962	429	142	+3
	YN2727	28216	39.74	1ab	300-20473	20175	6724	+3	CUAAAC(216)AUG
				1a	300-12440	12141	4047
				1b	12440-20473	8034	2677
				S	20470-24528	4059	1352	+1	CUAAAC(4)AUG
				NS3	24528-25184	657	218	+3	CATTAC(26)AUG
				E	25209-25433	225	74	+3	CUAAAC(10)AUG
				M	25440-26120	681	226	+3	CUAAAC(4)AUG
				N	26131-27285	1155	384	+1	CUAAAC(3)AUG
				NS7a	27295-27546	252	83	+1	CUAAAC(7)AUG
				NS7b	27534-27962	429	142	+3
