# Supplementary material for: Genomic Characterization of Diverse Bat Coronavirus HKU10 in Hipposideros Bats
Source: Viruses. 2021 Sep 29;13(10):1962. doi: 10.3390/v13101962 (PMC8540636; doi:10.3390/v13101962)
Supplement: Supplementary file 1 [file viruses-13-01962-s001.zip › viruses-1340913-supp-proof/Supplementary Table S5_Pseudovirus entry.xlsx]

## Sheet: Sheet1
Supplementary Table S5. Susceptibility test of Ro-BtCoV HKU10 and BtCoV HKU10 LA7560.
Cell lines	Ro-BtCoV HKU10		BtCoV HKU10 LA7560		MERS-CoV
	No treated	TPCK-trypsin treated	No treated	TPCK-trypsin treated	No treated
Human
Respiratory tract
Hep-2	-	-	-	-	-
A549	-	-	-	-	+/-
Calu-3	-	-	-	-	++
H292	-	-	-	-	-
Intestinal tract
Caco-2	-	-	-	-	++++
Liver
Huh-7	+	+	+	+	++++
Genitourinary tract
Hela	-	-	-	-	-
HEK-293T	-	-	-	-	+/-
Muscle cell
RD	+	+	+	+	-
Nerve cell
CCF-STTG1	-	-	-	-	-
Immune cell
THP-1	-	-	-	-	-
Bats
RsKT	-	-	-	-	+
RsLu4323	-	-	-	-	++
RsBrT	-	-	-	-	-
RlKT	-	-	-	-	-
HpLuT	-	-	-	-	-
Tb1-Lu	-	+	-	+	-
RaK4324	-	-	-	-	-
Paki	-	-	-	-	-
Other mammals
LLC-MK2	-	-	-	-	++
Vero	-	-	-	-	++
BHK21	-	-	-	-	-
MDCK	-	-	-	-	-
FK	-	-	-	-	-
SIEC	-	-	-	-	-
NIH-3T3	-	-	-	-	-
V79	-	-	-	-	-
Note: The luciferase signal intensity was normalized to fold changes compared to mock. “-”, <2-fold increase; “+/-”, 2-5 fold increase; “+”5-20 fold increase, “++” 20-100 fold increase, “++++”, >1000 fold increase.
